# Supplementary material for: Estimation of groundwater recharge rates using soil-water isotope profiles: a case study of two contrasting dune types on Langeoog Island, Germany
Source: Springer Nature journal article supplement (doi:10.1007/s10040-022-02471-y), 2022-03-24

## Hydrogeology Journal - Electronic Supplementary Material (ESM1)

Estimation of groundwater recharge rates using soil water isotope profiles: a case study of two contrasting dune types on Langeoog Island, Germany

Post<sup>1,2</sup>, V.E.A., Zhou<sup>3</sup>, T., Neukum<sup>1</sup>, C., Koeniger<sup>1</sup>, P., Houben<sup>1\*</sup>, G.J., Lamparter<sup>1</sup>, A., Šimůnek<sup>3</sup>, J.

<sup>1</sup>Federal Institute for Geosciences and Natural Resources (BGR), Stilleweg 2, D-30655 Hannover, Germany

<sup>2</sup>Edinsi Groundwater, Nederhorst den Berg, The Netherlands

<sup>3</sup>University of California, Riverside, Department of Environmental Sciences

\*Corresponding author. Phone: +49-(0)511-643-2373, Email: georg.houben@bgr.de

Within this document (ESM1)

- Summary results of the uncertainty analysis of the annual recharge rates
- Google Earth satellite images of the soil profile sampling sites in August 2015 and August 2019.

Additional file (ESM2)

- Animation showing the simulated  $\delta^2\text{H}$  versus depth profile for the period 20 October 2018 to 26 June 2019

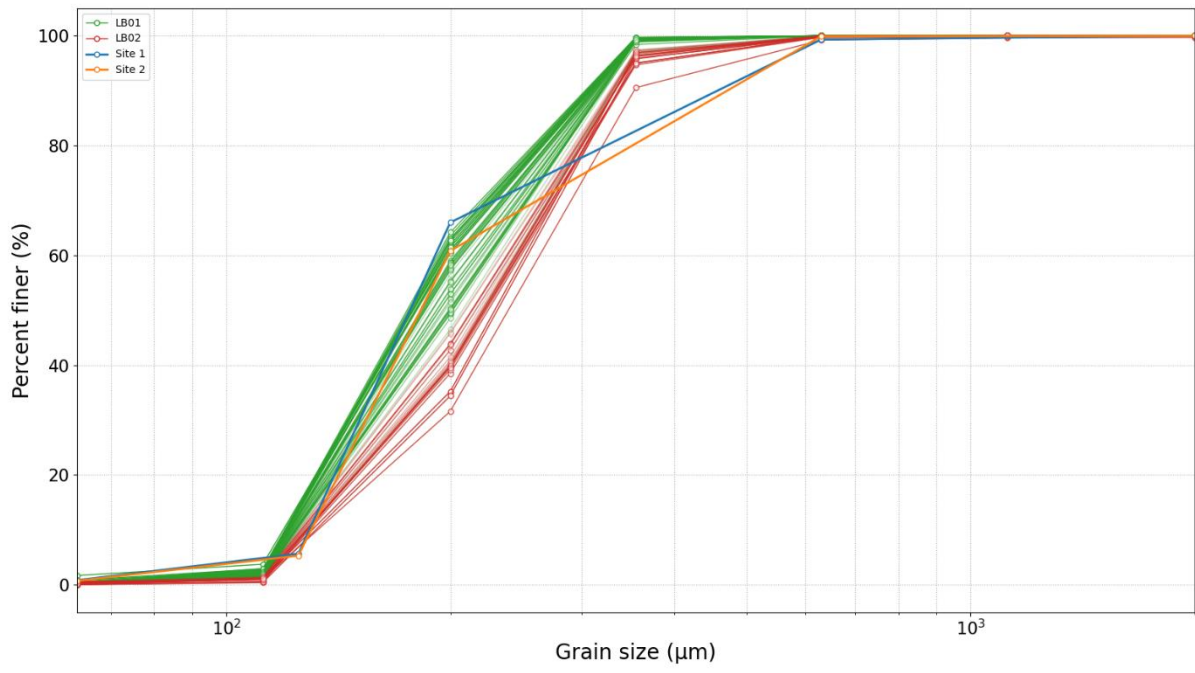

Figure S1: Particle size distribution curves of the soil samples.

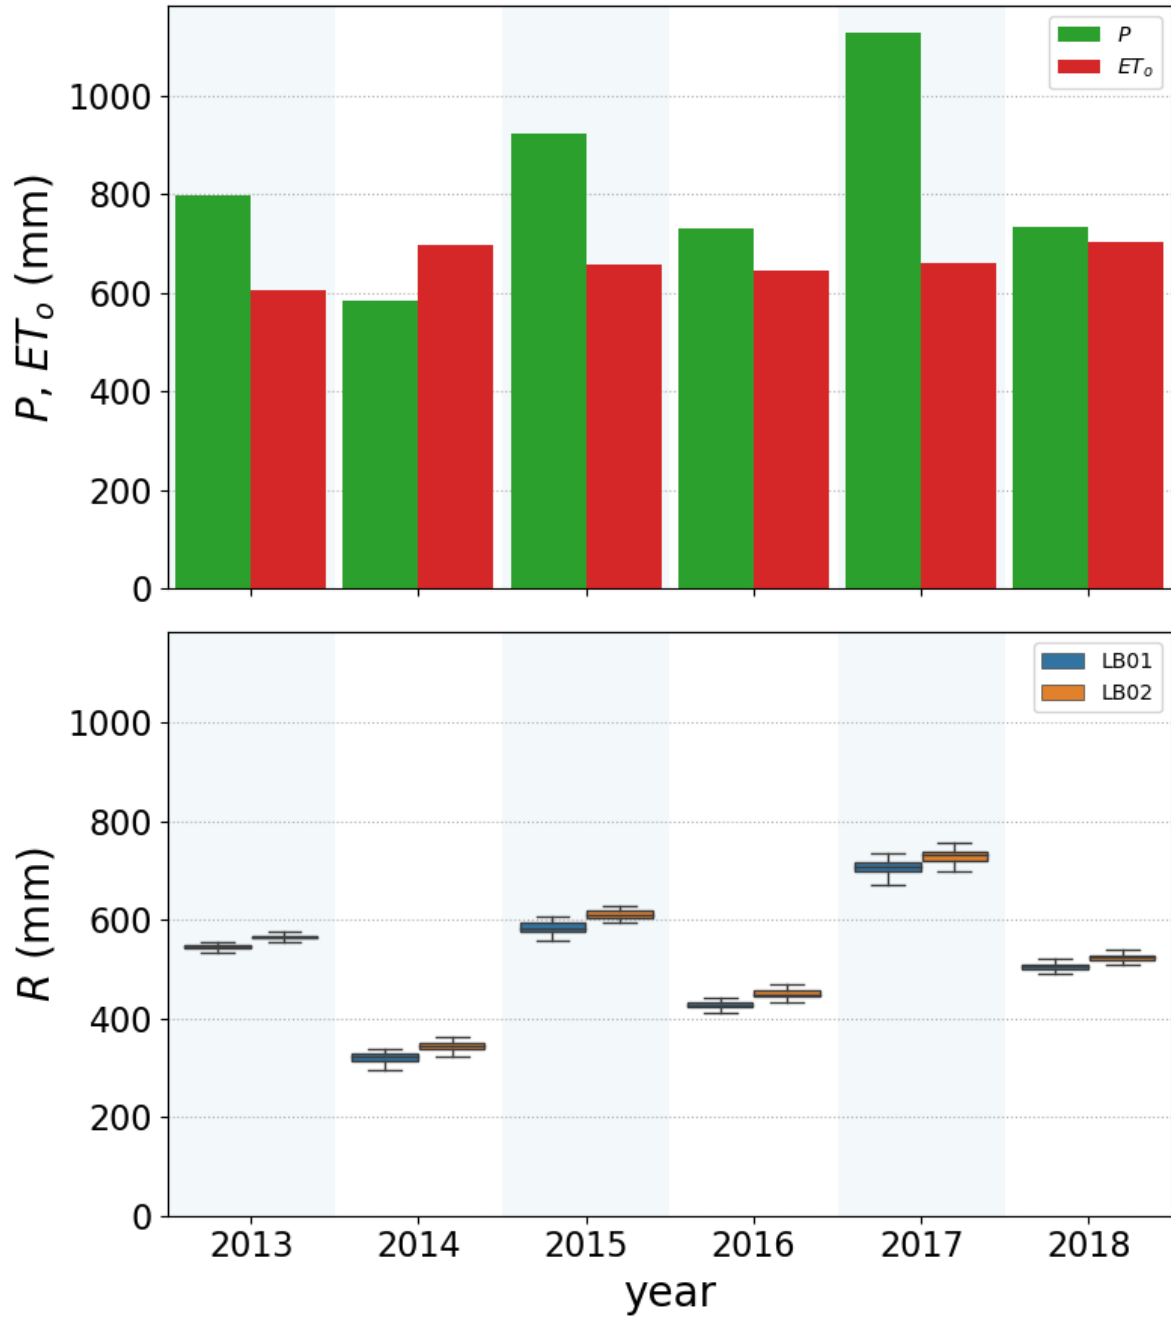

Figure S2 Top: Rainfall (green bars) and ET<sub>0</sub> (red bars) for the simulation years considered. Bottom: Box-whisker plot of the annual recharge rates for LB01 (blue) and LB02 (orange).

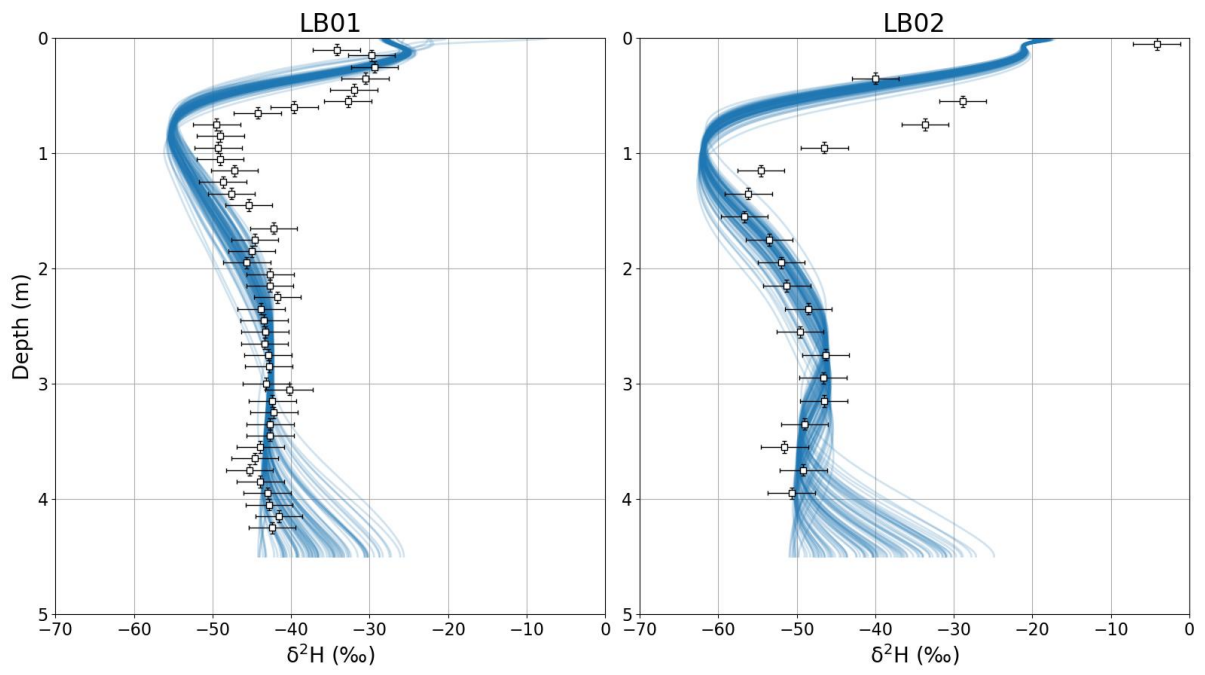

Figure S3: Measured and simulated  $\delta^2\text{H}$  values for profile LB01 (left) and profile LB02 (right). Each of the blue lines represent a model realization.

Table S1: Van Genuchten-Mualem model parameter ranges considered in the uncertainty analysis. Parameters were assumed to be normally distributed. Units of  $K_s$  are cm/day.

| Parameter  | Mean   | Standard deviation |
|------------|--------|--------------------|
| $\theta_r$ | 0.045  | 0.005              |
| $\theta_s$ | 0.39   | 0.010              |
| $K_s$      | 750    | 200                |
| $\alpha$   | 0.0233 | 0.002              |
| $n$        | 4      | 0                  |
| $l$        | 0.5    | 0                  |

Table S2: Summary statistics of the annual recharge rates based on the uncertainty analysis. All recharge values are in mm/yr.

|             | <b>LB01</b> |             |             |             |             |             |
|-------------|-------------|-------------|-------------|-------------|-------------|-------------|
| <b>year</b> | <b>2013</b> | <b>2014</b> | <b>2015</b> | <b>2016</b> | <b>2017</b> | <b>2018</b> |
| count       | 92          | 92          | 92          | 92          | 92          | 92          |
| mean        | 543         | 321         | 585         | 426         | 705         | 503         |
| std         | 10          | 9           | 11          | 10          | 14          | 17          |
| min         | 460         | 288         | 558         | 362         | 652         | 365         |
| 25%         | 541         | 314         | 577         | 423         | 697         | 499         |
| 50%         | 544         | 322         | 583         | 426         | 707         | 506         |
| 75%         | 548         | 329         | 594         | 432         | 715         | 510         |
| max         | 561         | 336         | 607         | 443         | 734         | 520         |
|             | <b>LB02</b> |             |             |             |             |             |
| <b>year</b> | <b>2013</b> | <b>2014</b> | <b>2015</b> | <b>2016</b> | <b>2017</b> | <b>2018</b> |
| count       | 96          | 96          | 96          | 96          | 96          | 96          |
| mean        | 565         | 344         | 611         | 450         | 729         | 522         |
| std         | 5           | 8           | 9           | 7           | 13          | 7           |
| min         | 552         | 323         | 595         | 433         | 693         | 508         |
| 25%         | 562         | 338         | 603         | 444         | 720         | 517         |
| 50%         | 565         | 345         | 610         | 448         | 730         | 523         |
| 75%         | 568         | 349         | 619         | 456         | 736         | 527         |
| max         | 576         | 362         | 629         | 469         | 756         | 539         |

Figure S4 Aerial images showing difference in vegetation between 2015 and 2019 (source: Google Earth).

July 2015

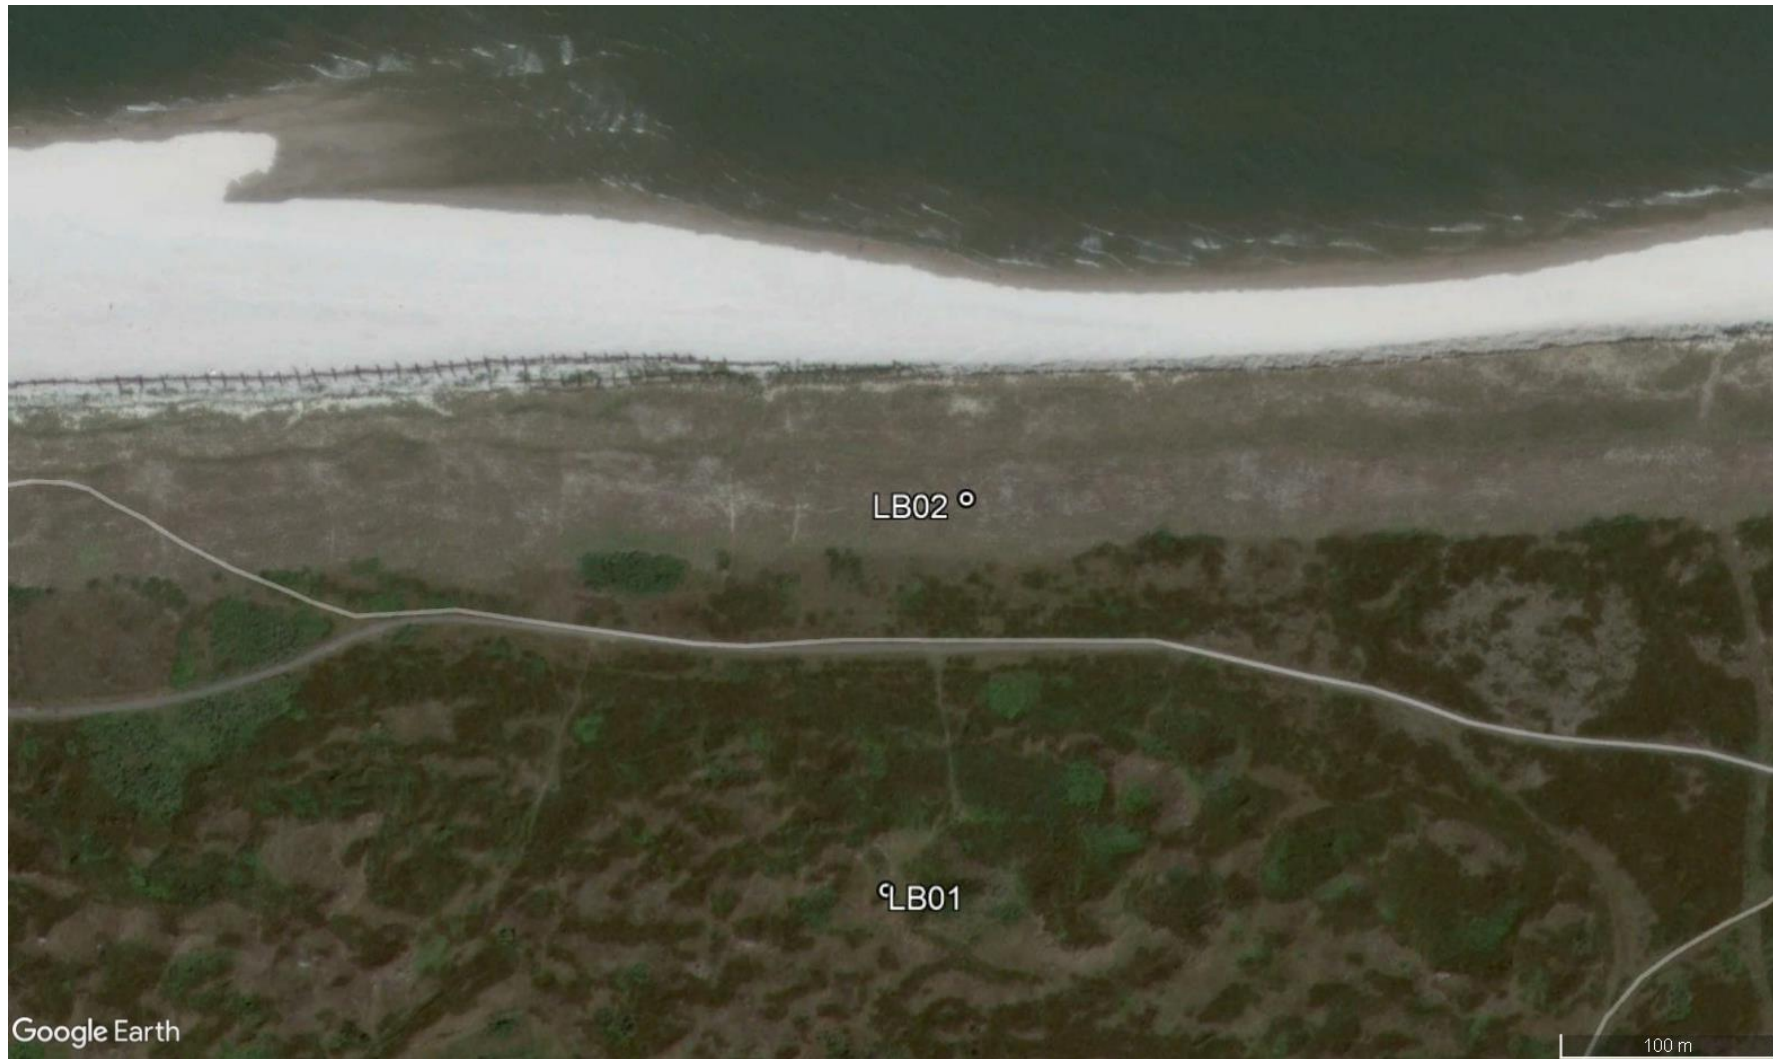

August 2019

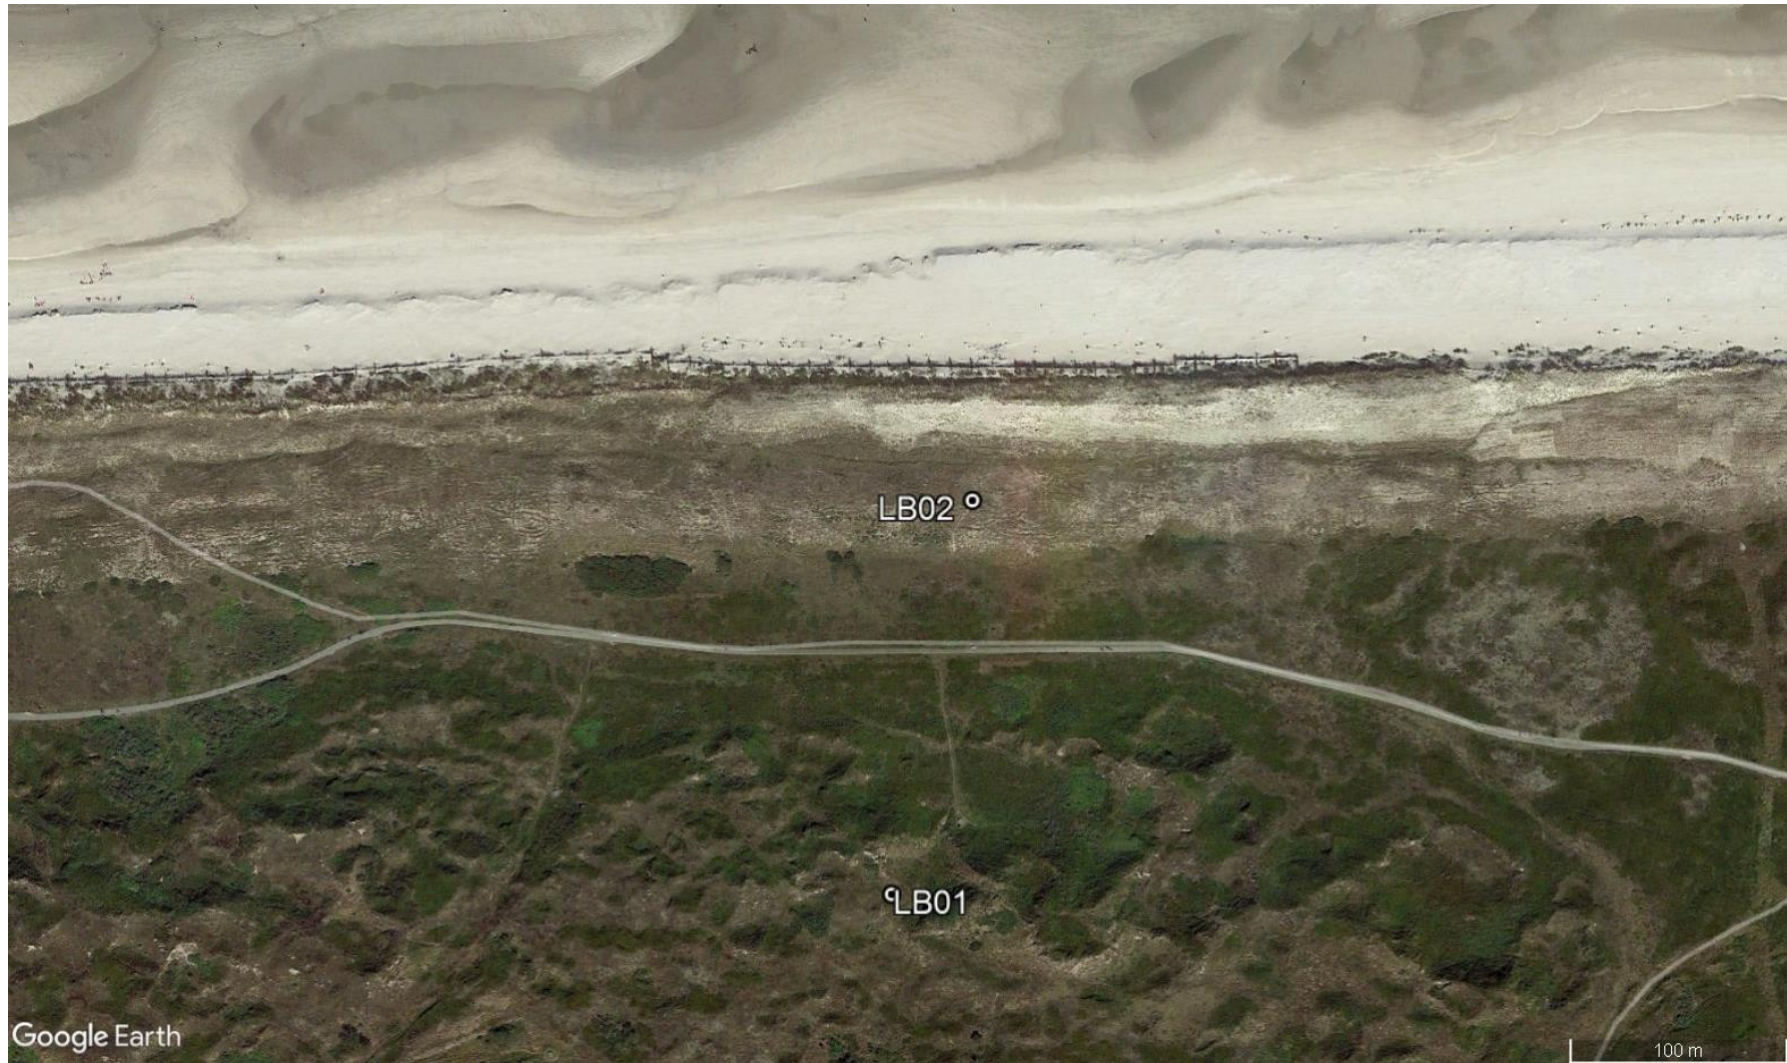

Supplement: MOESM1 [file 20251924]
